# Supplementary material for: Community drug retail outlet staff’s knowledge, attitudes and practices towards non-prescription antibiotics use and antibiotic resistance in the Amhara region, Ethiopia with a focus on non-urban towns
Source: PubMed Central journal article supplement (PMC9052473; doi:10.1186/s13756-022-01102-1), 2022-04-29
Supplement: 13756_2022_1102_MOESM1_ESM.pdf [file 13756_2022_1102_MOESM1_ESM.pdf]

**Additional File 1: Data collection instrument**

**Community drug retail outlet staff’s knowledge, attitudes and practices towards non-prescription antibiotics use and antibiotic resistance in the Amhara region, Ethiopia with a focus on non-urban towns.**

Sewunet Admasu Belachew<sup>1,2\*</sup>, Lisa Hall<sup>1</sup>, Linda A Selvey<sup>1</sup>

<sup>1</sup>School of Public Health, The University of Queensland, 288 Herston Rd, Herston, Qld 4006, Australia

<sup>2</sup>School of Pharmacy, Faculty of Medicine and Health Sciences, University of Gondar, Ethiopia

**\*Corresponding author**

Sewunet Admasu Belachew

School of Public Health, The University of Queensland, 288 Herston Rd, Herston, Qld 4006, Australia

Email: s.admasubelachew@uq.edu.au

**Authors’ email address**

Linda A Selvey: l.selvey@uq.edu.au

Lisa Hall: [l.hall3@uq.edu.au](mailto:l.hall3@uq.edu.au)

**Data collection tool for community pharmacy self-reported survey**

Reference no: \_\_\_\_\_

District: \_\_\_\_\_

**(Please answer all questions and statements)**

**Part 1: Characteristics of the community drug retail outlet (CDRO) and CDRO staff**

| S.N | Items                           | Responses                                                  | (√) |
|-----|---------------------------------|------------------------------------------------------------|-----|
| 1   | Age                             | .....years                                                 |     |
| 2   | Work experience (years) in CDRO |                                                            |     |
| 3   | Gender                          | Male                                                       |     |
|     |                                 | Female                                                     |     |
|     |                                 | Do not want to specify                                     |     |
| 4   | Level of education              | Druggist/pharmacy technician (diploma level)               |     |
|     |                                 | Pharmacist (degree level)                                  |     |
|     |                                 | Pharmacist (master’s level or more)                        |     |
|     |                                 | Non-pharmacy professional (health assistants, nurses etc.) |     |
|     |                                 | Non-professional                                           |     |
| 5   | CDRO employment type            | CDRO owner                                                 |     |

|    |                                                                                                                                                   |                                                                 |  |
|----|---------------------------------------------------------------------------------------------------------------------------------------------------|-----------------------------------------------------------------|--|
|    |                                                                                                                                                   | Employee                                                        |  |
|    |                                                                                                                                                   | Other specify .....                                             |  |
| 6  | Type of CDRO                                                                                                                                      | Pharmacy                                                        |  |
|    |                                                                                                                                                   | Drug store/shop                                                 |  |
|    |                                                                                                                                                   | Rural drug vendor                                               |  |
| 7  | Employment status                                                                                                                                 | Full time                                                       |  |
|    |                                                                                                                                                   | Part time                                                       |  |
| 8  | Are you currently a registered pharmacy professional (have already certificate)?                                                                  | Yes                                                             |  |
|    |                                                                                                                                                   | No                                                              |  |
| 9  | Location of the CDRO                                                                                                                              | Near to health facility (within 1km, approximately)             |  |
|    |                                                                                                                                                   | Far from the health facility (more than 1 km, approximately)    |  |
| 10 | Location of the CDRO                                                                                                                              | At the centre of the town (within 1km, approximately)           |  |
|    |                                                                                                                                                   | Far from the centre of the town (more than 1 km, approximately) |  |
| 11 | CDRO type                                                                                                                                         | Chain                                                           |  |
|    |                                                                                                                                                   | Individual                                                      |  |
| 12 | In total, how many CDRO staff work in your CDRO?                                                                                                  |                                                                 |  |
| 13 | How many of the CDRO staff are on duty in a single day?                                                                                           |                                                                 |  |
| 14 | On average, how many clients visit your CDRO in a day?                                                                                            |                                                                 |  |
| 15 | On average in a day, how many clients approach your CDRO (without prescription) requesting for management of their minor ailments (in percentage) |                                                                 |  |
| 16 | On average, how many prescriptions do you receive per day?                                                                                        |                                                                 |  |
| 17 | On average, out of the prescription received in a day, how many of them are calling for antibiotic/s (in percentage)?                             |                                                                 |  |
| 18 | On average, how many of the antibiotic/s requests in a day are without prescription (in percentage)?                                              |                                                                 |  |
| 19 | On average, out of the non-prescription antibiotic/s request/s in a day, for how many of the requests do you supply (in percentage)?              |                                                                 |  |
| 20 | Have you received previous training on medication use and dispensing practice (with an emphasis on antimicrobials) in the last 3 years?           | Yes                                                             |  |
|    |                                                                                                                                                   | No                                                              |  |

**Part 2: Knowledge**

**This section is about your knowledge of antibiotics. Please tick the relevant box in response to the statements.**

For each statement you need to tick relevant one box only

| S.N | Statement                                                                                                 | Yes | No | Unsure |
|-----|-----------------------------------------------------------------------------------------------------------|-----|----|--------|
| 1   | An antibiotic is a medicine used to kill or inhibit the growth of bacteria, fungus, virus, and parasites. |     |    |        |
| 2   | Diphenhydramine is an antibiotic used in treating upper respiratory tract infections.                     |     |    |        |
| 3   | Patients allergic to amoxicillin (anaphylaxis type) should not use cephalexin.                            |     |    |        |
| 4   | An antibiotic is any agent used to kill or inhibit the growth of bacteria.                                |     |    |        |

|    |                                                                                                                                        |  |  |  |
|----|----------------------------------------------------------------------------------------------------------------------------------------|--|--|--|
| 5  | If taken too often without a clear indication, antibiotics are less likely to work in the future.                                      |  |  |  |
| 6  | Diseases with viral causes can be treated with antibiotics.                                                                            |  |  |  |
| 7  | Antibiotics can be used as a preventive measure to fight against future microbial (i.e. fungus, bacteria, virus and parasite) attacks. |  |  |  |
| 8  | Keeping leftover antibiotics from a previous course to use next time for the same infection is a good practice                         |  |  |  |
| 9  | Patients can stop taking antibiotics when their symptoms improve before completing their prescribed course of therapy.                 |  |  |  |
| 10 | Acute sore throat can be treated with antibiotics irrespective of the cause                                                            |  |  |  |
| 11 | Fever can be treated directly with antibiotics.                                                                                        |  |  |  |
| 12 | Bacterial infections can be treated with antibiotics                                                                                   |  |  |  |
| 13 | Common cold and cough should always be treated with antibiotics.                                                                       |  |  |  |
| 14 | Wound infection can be treated with antibiotics irrespective of the cause                                                              |  |  |  |
| 15 | Acute diarrhoea can be treated with antibiotics irrespective of the cause.                                                             |  |  |  |
| 16 | Urinary tract infections can be treated with antibiotics irrespective of the cause.                                                    |  |  |  |
| 17 | Dispensing antibiotics without a prescription contributes to inappropriate use of antibiotics                                          |  |  |  |
| 18 | Inappropriate use of antibiotics can lead to ineffective treatment.                                                                    |  |  |  |
| 19 | Inappropriate use of antibiotics increases the emergence of bacterial resistance to antibiotics                                        |  |  |  |
| 20 | Clients' self-medication with antibiotics contributes to the development of antibiotic resistance.                                     |  |  |  |
| 21 | Antibiotic resistance is an important and serious public health issue facing the world.                                                |  |  |  |
| 22 | Dispensing antibiotics without a prescription will lead to development of antibiotic resistance.                                       |  |  |  |
| 23 | Skipping one or two doses of an antibiotic does not contribute to the development of antibiotic resistance.                            |  |  |  |
| 24 | Resistant bacteria cannot be spread in healthcare institutions and communities.                                                        |  |  |  |
| 25 | Lack of patient adherence to prescribed antibiotic treatment regimens is one of the main causes of antibiotic resistance.              |  |  |  |
| 26 | In complete antibiotic course is one of the causes of antibiotic resistance.                                                           |  |  |  |
| 27 | Use of antibiotics for longer than normal prescribed course is one of the causes of antibiotic resistance.                             |  |  |  |
| 28 | The occurrence of antibiotic resistance is mainly a problem in hospital settings compared to the community                             |  |  |  |
| 29 | Dispensing antibiotic shorter than normal course by CDRO staff is one of the main causes of antibiotic resistance.                     |  |  |  |
| 30 | I have a clear understanding of the rules and regulations about dispensing antibiotics (with or without a prescription) in Ethiopia    |  |  |  |
| 31 | In Ethiopia, antibiotics are categorised under prescription only medications.                                                          |  |  |  |
| 32 | CDRO staff can legally dispense antibiotics without a prescription in Ethiopia.                                                        |  |  |  |
| 33 | CDRO staff can be penalised for dispensing antibiotics without a prescription.                                                         |  |  |  |

### Part 3: Attitudes

**This section is about your attitude towards antibiotics and/or antibiotic dispensing practice. Please tick the relevant box in response to the statements.**

For each statement you need to tick relevant one box only

| S.N | Statement                                                                                                              | Strongly disagree | Disagree | Never agree nor disagree | Agree | Strongly agree |
|-----|------------------------------------------------------------------------------------------------------------------------|-------------------|----------|--------------------------|-------|----------------|
| 1   | I believe antibiotics may have a role in recovering from the following health conditions, irrespective of their cause; |                   |          |                          |       |                |
|     | 1. Fever                                                                                                               |                   |          |                          |       |                |
|     | 2. Common cold and cough                                                                                               |                   |          |                          |       |                |

|    |                                                                                                                                                                                                        |  |  |  |  |  |
|----|--------------------------------------------------------------------------------------------------------------------------------------------------------------------------------------------------------|--|--|--|--|--|
|    | 3. Acute sore throat<br>4. Acute diarrhoea<br>5. Wound infection<br>6. Uncomplicated urinary tract infection                                                                                           |  |  |  |  |  |
| 2  | The CDRO staff should dispense antibiotics without prescription because refusing to dispense antibiotics without a prescription will negatively affect the CDRO's sales and profits.                   |  |  |  |  |  |
| 3  | The education I acquired or the knowledge I have about antibiotics is adequate to allow me to dispense antibiotics without a prescription.                                                             |  |  |  |  |  |
| 4  | The CDRO staff should dispense antibiotics without prescription because refusing clients' request to dispense antibiotics without prescription may cause client dissatisfaction with the CDRO service. |  |  |  |  |  |
| 5  | The CDRO staff should dispense antibiotics without prescription as clients may easily obtain a prescription from their doctor                                                                          |  |  |  |  |  |
| 6  | As the pressure from the CDRO owner to increase sales and profits is high, the CDRO staff should dispense antibiotics without a prescription                                                           |  |  |  |  |  |
| 7  | A CDRO staff should receive more education about antibiotics to improve appropriate dispensing of antibiotics.                                                                                         |  |  |  |  |  |
| 8  | The CDRO staff should dispense antibiotics without prescription as they will get it easily from another retail outlet anyway.                                                                          |  |  |  |  |  |
| 9  | If a patient with a bacterial infection visits a CDRO, the CDRO staff should dispense antibiotics without asking for a prescription.                                                                   |  |  |  |  |  |
| 10 | The CDRO staff should not dispense antibiotics without a prescription because provision of antibiotics without prescription leads to the development of resistance.                                    |  |  |  |  |  |
| 11 | The CDRO staff can dispense antibiotics without a prescription because in my opinion, antibiotics use doesn't always cause resistance.                                                                 |  |  |  |  |  |
| 12 | If CDRO staff know that clients have neither the time nor the finance to visit a doctor, they should dispense antibiotics without the prescription.                                                    |  |  |  |  |  |
| 13 | Antibiotics are already overused by the general public in Ethiopia; therefore, dispensing antibiotics without a prescription is not going to make matters worse.                                       |  |  |  |  |  |
| 14 | Dispensing antibiotics without a prescription should be more closely controlled by the authorities.                                                                                                    |  |  |  |  |  |
| 15 | A CDRO staff should encourage patients to consult a physician and get a prescription before visiting the CDRO.                                                                                         |  |  |  |  |  |
| 16 | Promoting appropriate use of antibiotics is a shared responsibility of healthcare professionals, patients and policy makers.                                                                           |  |  |  |  |  |
| 17 | A CDRO staff should dispense antibiotics without prescription because it is always difficult for CDRO staff to refuse supplying                                                                        |  |  |  |  |  |

|    |                                                                                                                                                                                                                                                                                                                                                                                                                                                                                                          |  |  |  |  |  |
|----|----------------------------------------------------------------------------------------------------------------------------------------------------------------------------------------------------------------------------------------------------------------------------------------------------------------------------------------------------------------------------------------------------------------------------------------------------------------------------------------------------------|--|--|--|--|--|
|    | antibiotics without prescription with an ever increasing demand from clients.                                                                                                                                                                                                                                                                                                                                                                                                                            |  |  |  |  |  |
| 18 | I believe that as a CDRO staff, I have the right to contribute towards the appropriate use antibiotic in Ethiopia.                                                                                                                                                                                                                                                                                                                                                                                       |  |  |  |  |  |
| 19 | Clients should stop self-medicating with antibiotics to prevent the occurrence of antibiotic resistance.                                                                                                                                                                                                                                                                                                                                                                                                 |  |  |  |  |  |
| 20 | Dispensing antibiotics without a prescription is not a problem because; <ol style="list-style-type: none"> <li>1. I believe that antibiotics are safe medicines.</li> <li>2. I believe that antibiotics have no or few side effects.</li> <li>3. I have the ability to assess the patients' need for antibiotics.</li> <li>4. I know whether to dispense antibiotics to the patient or refer them to a doctor.</li> <li>5. I can properly counsel patients on appropriate use of antibiotics.</li> </ol> |  |  |  |  |  |
|    |                                                                                                                                                                                                                                                                                                                                                                                                                                                                                                          |  |  |  |  |  |
|    |                                                                                                                                                                                                                                                                                                                                                                                                                                                                                                          |  |  |  |  |  |
|    |                                                                                                                                                                                                                                                                                                                                                                                                                                                                                                          |  |  |  |  |  |
|    |                                                                                                                                                                                                                                                                                                                                                                                                                                                                                                          |  |  |  |  |  |

#### Part 4: Practices

**This section is about antibiotic/s dispensing practice. Please tell us how frequently you perform the followings, by ticking the relevant box below for each statement.**

For each statement you need to tick one box only

| S.N | Items                                                                                                             | Never (0%) | Some of the time (25%) | Half of the time (50%) | Most of the time (75%) | Always 100% |
|-----|-------------------------------------------------------------------------------------------------------------------|------------|------------------------|------------------------|------------------------|-------------|
| 1   | I dispense antibiotic/s without prescription.                                                                     |            |                        |                        |                        |             |
| 2   | I dispense antibiotics without a prescription up on direct request from a client.                                 |            |                        |                        |                        |             |
| 3   | For adult with bacterial infection, I provide antibiotics without asking for a prescription.                      |            |                        |                        |                        |             |
| 4   | I dispense antibiotics without prescription for a family member or someone I know closely                         |            |                        |                        |                        |             |
| 5   | For patients with minor ailments, I dispense antibiotics as over the counter drug.                                |            |                        |                        |                        |             |
| 6   | I dispense antibiotics without prescription for children with bacterial infection.                                |            |                        |                        |                        |             |
| 7   | For a child with viral infection, I dispense antibiotics without prescription.                                    |            |                        |                        |                        |             |
| 8   | I dispense antibiotics without a prescription for an adult with viral infection.                                  |            |                        |                        |                        |             |
| 9   | Have you dispensed antibiotic/s without prescription for the following condition in the last week, in what level? |            |                        |                        |                        |             |

|    |                                                                                                             |  |  |  |  |  |
|----|-------------------------------------------------------------------------------------------------------------|--|--|--|--|--|
|    | Common cold or cough                                                                                        |  |  |  |  |  |
|    | Acute diarrhoea                                                                                             |  |  |  |  |  |
|    | Uncomplicated urinary tract infection                                                                       |  |  |  |  |  |
|    | Wound infection                                                                                             |  |  |  |  |  |
|    | Acute sore throat                                                                                           |  |  |  |  |  |
| 10 | In what level, do you currently dispense antibiotic/s without prescription if you encounter a patient with; |  |  |  |  |  |
|    | Common cold or cough                                                                                        |  |  |  |  |  |
|    | Acute diarrhoea                                                                                             |  |  |  |  |  |
|    | Uncomplicated urinary tract infection                                                                       |  |  |  |  |  |
|    | Wound infection                                                                                             |  |  |  |  |  |
|    | Acute sore throat                                                                                           |  |  |  |  |  |

11. Could you please list the most common antibiotic/s dispensed without prescription in your CDRO in the space provided below?

12. Could you please tell us the main reason/s or health conditions for which antibiotic/s dispensed without prescription in your CDRO?

Thank you for your participation!

መጠይቅ

ማጣቀሻ ቁጥር \_\_\_\_\_

መርጃዉ የተሰበሰበበት ወረዳ \_\_\_\_\_

(እባክዎ ለሁሉም ጥያቄዎች ምላሽዎን ይስጡ)

ክፍል 1: የመድሃኒት ቤቱንና የመድሃኒት ቤቱ ሰራተኞችን/ባለሙያዎችን ባህሪያት በተመለከተ የሚዳስሱ መጠይቆች

| ተ.ቁ | ጥያቄ                                                                                       | ምላሽ                                                    | (ህ) |
|-----|-------------------------------------------------------------------------------------------|--------------------------------------------------------|-----|
| 1   | እድሜ                                                                                       | .....በአመት                                              |     |
| 2   | የስራ ልምድ (በአመት) በመድሃኒት ቤት ዉስጥ                                                              |                                                        |     |
| 3   | ጾታ                                                                                        | ወንድ                                                    |     |
|     |                                                                                           | ሴት                                                     |     |
|     |                                                                                           | መግለፅ አልፏልግም                                            |     |
| 4   | የትምህርት ደረጃ                                                                                | ዲፕሎማ/ፋርማሲ ቴክኒሻን( ዲፕሎማ)                                 |     |
|     |                                                                                           | ፋርማሲስት (ዲግሪ)                                           |     |
|     |                                                                                           | ፋርማሲስት (ማስተርስ ወይም በላይ)                                 |     |
|     |                                                                                           | የፋርማሲ ባለሙያ ያልሆነ (የጤና ረዳት, ነርስ እና የመሳሰሉት.)<br>ባለሙያ ያልሆነ |     |
| 5   | የመድሃኒት ቤት ቅጥር አይነት                                                                        | የመድሃኒት ቤቱ ባለቤት                                         |     |
|     |                                                                                           | ተቀጣሪ                                                   |     |
|     |                                                                                           | ከተጠቀሱት ዉጭ ካለ ይጥቀሱ.....                                 |     |
| 6   | የመድሃኒት ቤቱ አይነት                                                                            | ፋርማሲ/መድሃኒት ቤት/                                         |     |
|     |                                                                                           | መድሃኒት መደብር                                             |     |
|     |                                                                                           | የገጠር መድሃኒት ቤት                                          |     |
| 7   | የቅጥር ሁኔታ                                                                                  | ሙሉ ሰአት                                                 |     |
|     |                                                                                           | በክፊል                                                   |     |
| 8   | የፋርማሲ ሙያ ፍቃድ ምዝገባ ወረቀት አለዎት?                                                              | አዎ                                                     |     |
|     |                                                                                           | አይ                                                     |     |
| 9   | የመድሃኒት ቤቱ አድራሻ                                                                            | ከጤና አገልግሎት መስጫ አጠገብ (በግምት በ 1ኪ/ሜ ክልል ዉስጥ)              |     |
|     |                                                                                           | ከጤና አገልግሎት መስጫ የራቀ (በግምት ከ 1ኪ/ሜ በላይ)                   |     |
| 10  | የመድሃኒት ቤቱ አድራሻ                                                                            | ከአገሩ እምብርት ዉስጥ (በግምት በ 1ኪ/ሜ ክልል ዉስጥ)                   |     |
|     |                                                                                           | ከአገሩ እምብርት የራቀ (በግምት ከ 1ኪ/ሜ በላይ)                       |     |
| 11  | መድሃኒት ቤትዎ ባለ ቅርንጫፍ ነዉ                                                                     | አዎ                                                     |     |
|     |                                                                                           | አይ                                                     |     |
| 12  | በ አጠቃላይ፣ በመድሃኒት ቤትዎ ስንት ባለሙያ/ሰራተኛ አለ?                                                     |                                                        |     |
| 13  | በእያንዳንዱ ቀን ስንት ባለሙያ/ሰራተኛ በስራ ላይ ናቸዉ?                                                      |                                                        |     |
| 14  | በአማካኝ በቀን ስንት ህሙማን/ደንበኛ/ መድሃኒት ቤትዎን ይጎበኛል?                                                |                                                        |     |
| 15  | በአማካኝ በቀን ስንት ደንበኞች ለጥቃቅን በሽታቸው (ማይነር ኤልመንት) የመድሃኒት ማዘዣ ሳይዙ ህክምና ይጠይቃሉ? በመቶኛ ይመልሱ         |                                                        |     |
| 16  | በአማካኝ በቀን ስንት የመድሃኒት ማዘዣ ያስተናግዳሉ/ይቀበላሉ?                                                   |                                                        |     |
| 17  | በአማካኝ በቀን ከተቀበሉት የመድሃኒት ማዘዣ ምን ያህሉ የፀረ-ባክቴሪያ/ዎች ትዕዛዝ ነው ወይንም ፀረ-ባክቴሪያ/ዎችን አካቷል? በመቶኛ ይመልሱ |                                                        |     |

|    |                                                                                           |    |  |
|----|-------------------------------------------------------------------------------------------|----|--|
| 18 | በአማካኝ በቀን ከሚመጡ የፀረ-ባክቴሪያ መጠይቆች ምን ያህል ያለ መድሃኒት ማዘዣ ነው? በመቶኛ ይመልሱ                          |    |  |
| 19 | በአማካኝ በቀን ያለ መድሃኒት ማዘዣ ከሚመጡ የፀረ-ባክቴሪያ/ዎች መጠይቆች ምን ያህልን ያድላሉ (ይሸጣሉ)? በ መቶኛ ይመልሱ            |    |  |
| 20 | የመድሃኒት (በተለይ ስለፀረ-ረቂቅ ትህዋሲያን) አጠቃቀም እና እድላ ትግበራን በተመለከተ ስልጠና ወስደዉ ያዉቃሉ ባለፉት ሶስት አመታት ውስጥ? | አዎ |  |
|    |                                                                                           | አይ |  |

**ክፍል 2: እውቀትን በተመለከተ**

**ይህ የመጠይቅ ክፍል ስለ ፀረ-ባክቴሪያ/ዎች ስላለዎት እውቀት ነው። እባክዎ ተገቢው ሳጥን ላይ ምልክት በማድረግ ይምረጡ።**

ለእያንዳንዱ ጥያቄ አንድ ሳጥን ብቻ ላይ ነው ምልክት የሚያደርጉት

| ተ.ቁ | ጥያቄ                                                                                                  | አዎ | አይ | እርግጠኛ አይደለሁም |
|-----|------------------------------------------------------------------------------------------------------|----|----|--------------|
| 1   | ፀረ-ባክቴሪያ፣ ባክቴሪያን፣ ቫይረስን፣ ፈንገስን፣ ፓራሳይትን ለመግደል ወይም እድገታቸውን ለመግታት የሚጠቅም መድሃኒት ነው።                       |    |    |              |
| 2   | ዳይፌንግላይዲን ፀረ-ባክቴሪያ ሲሆን የላይኛው መተንፈሻ አካላት በሽታን(ኢንፌክሽን) ለማከም ነው የምንጠቀምበት።                               |    |    |              |
| 3   | ለአሞክሳሲሊን አለርጂ (የሰውነት አለመቀበል ካጋጠመዎ) ከሆኑ ሴፋሌክሲን መጠቀም የለባችዉም።                                           |    |    |              |
| 4   | ፀረ-ባክቴሪያ ባክቴሪያን ለመግደል ወይም እድገታቸውን ለመግታት የሚያገለግል መድሃኒት ነው።                                            |    |    |              |
| 5   | ያለ ግልፅ ትዕዛዝ ፀረ-ባክቴሪያ/ዎች ዘወትር ከተወሰዱ፣ ወደ ፊት የመስራታቸው ነገር ዝቅተኛ ነው።                                       |    |    |              |
| 6   | ፀረ-ባክቴሪያ ወደ ፊት የሚያጋጥሙ ረቂቅ-ትህዋሲያን ( ባክቴሪያን፣ ቫይረስን፣ ፈንገስን፣ ፓራሳይትን) ለመዋጋት እንደ ቅድመ መከላከያ ዘዴ መጠቀም እንችላለን። |    |    |              |
| 7   | ከበፊት ህክምና የተረፈ ፀረ-ባክቴሪያ አስቀምጦ በቀጣይ ለተመሳሳይ ተላላፊ በሽታ(ኢንፌክሽን) መጠቀም ጥሩ ተግባር (ልምድ) ነው።                    |    |    |              |
| 8   | ሀሙማን የበሽታቸው ምልክት/ስሜት ሲሻሻል ፀረ-ባክቴሪያዎን የታዘዘላቸው ግዜ ባያልቅም መውሰድ ማቆም ይችላሉ                                  |    |    |              |
| 9   | በቫይረስ ምክንያት የሚመጡ በሽታወች በፀረ-ባክቴሪያ መታከም ይችላሉ።                                                          |    |    |              |
| 10  | አጣዳፊ በጉንፋን የተዘጋ ጉሮሮን ለማከም መንስኤው ምንም ይሁን ፀረ-ባክቴሪያ መጠቀም እንችላለን                                         |    |    |              |
| 11  | የሰውነት ትኩሳትን ቀጥታ በፀረ-ባክቴሪያ ማከም እንችላለን።                                                                |    |    |              |
| 12  | የ ባክቴሪያ ኢንፌክሽንን (በሽታን) በፀረ-ባክቴሪያ ማከም ይቻላል።                                                           |    |    |              |
| 13  | ጉንፋን እና ሳል ምንግዜም ዘወትር መታከም ያለባቸው በፀረ-ባክቴሪያ ነው።                                                       |    |    |              |
| 14  | የቁስል ኢንፌክሽንን መንስኤው ምንም ይሁን በፀረ-ባክቴሪያ ማከም ይቻላል።                                                       |    |    |              |
| 15  | አጣዳፊ ተቅማጥን መንስኤው ምንም ይሁን በፀረ-ባክቴሪያ ማከም ይቻላል።                                                         |    |    |              |
| 16  | የሽንት ቧንቧ ኢንፌክሽንን መንስኤው ምንም ይሁን በፀረ-ባክቴሪያ ማከም ይቻላል።                                                   |    |    |              |
| 17  | ያለ መድሃኒት ማዘዣ ፀረ-ባክቴሪያን ማደል በሀሙማን ዘንድ ትክክል ላልሆነ የፀረ-ባክቴሪያ አጠቃቀም አስተዋፆ አለው።                            |    |    |              |
| 18  | ትክክል ያልሆነ የፀረ-ባክቴሪያ አጠቃቀም ህክምናውን(መድሃኒቱን) ጥቅም የለሽ ያደርገዋል።                                             |    |    |              |
| 19  | ትክክል ያልሆነ የፀረ-ባክቴሪያ/ዎች አጠቃቀም የፀረ-ባክቴሪያ መቋቋም ክስተትን ይጨምራል።                                             |    |    |              |
| 20  | የደንበኞች በፀረ-ባክቴሪያ ራስን ማከም ፀረ-ባክቴሪያ የመቋቋም እድገት ላይ አስተዋፆ አለው።                                           |    |    |              |
| 21  | የፀረ-ባክቴሪያ መቋቋም አለማችን የተጋረጠባት አስፈላጊ እና አንገብጋቢ የማህበረሰብ ጤና ጉዳይ ነው።                                      |    |    |              |
| 22  | ያለ መድሃኒት ማዘዣ ፀረ-ባክቴሪያን ማደል የፀረ-ባክቴሪያ መቋቋም እንዲያድግ (እንዲከሰት) ያደርጋል።                                     |    |    |              |
| 23  | አንድ ወይም ሁለት የፀረ-ባክቴሪያን መጠን (ዶዝ) መዝለል የፀረ-ባክቴሪያ መቋቋም እድገት (ክስተት) ላይ አስተዋፆ የለውም።                       |    |    |              |
| 24  | ፀረ-ባክቴሪያን መቋቋም የሚችሉ ባክቴሪያዎች በጤና ተቋም ሆነ በህብረተሰቡ ውስጥ አይስፋፉም (አይዘመቱም)።                                  |    |    |              |
| 25  | በመድሃኒት ማዘዣ የታዘዙ የፀረ-ባክቴሪያ መድሃኒትን ተከታትሎ ያለመውሰድ ችግር ከዋና ዋናዎቹ የፀረ-ባክቴሪያ መቋቋም መንስኤዎች አንዱ ነው።             |    |    |              |
| 26  | ፀረ-ባክቴሪያ በክፍል ብቻ ወሰዶ ማቆም አንዱ ለፀረ-ባክቴሪያ መቋቋም መንስኤ ነው።                                                 |    |    |              |
| 27  | በመድሃኒት ማዘዣ ከታዘዘው ትክክል ጊዜ በላይ ፀረ-ባክቴሪያን መውሰድ አንዱ የፀረ-ባክቴሪያ መቋቋም መንስኤ ነው።                              |    |    |              |



|    |                                                                                                 |  |  |  |
|----|-------------------------------------------------------------------------------------------------|--|--|--|
| 28 | የፀረ-ባክቴሪያ መቋቋም ችግር በአብዛኛው የሚከሰተው በጤና ተቋማት(ከሆስፒታል) ነው ከህብረተሰቡ ውስጥ ከሚከሰተው ጋር ሲነፃፀር።               |  |  |  |
| 29 | የመድሃኒት ቤት ሰራተኞች/ባለሙያዎች ፀረ-ባክቴሪያን ከትክክለኛው ግዜ ያጠረ አድርጎ ማደል ከዋና ዋናዎቹ የፀረ-ባክቴሪያ መቋቋም መንስኤዎች አንዱ ነው። |  |  |  |
| 30 | እኔ በኢትዮጵያ ውስጥ የፀረ-ባክቴሪያ እደላን (በመድሃኒት ማዘዣ ወይም ያለማዘዣ ) በተመለከተ ስላሉ ደንቦችና መመሪያዎች ግልፅ የሆነ ግንዛቤ አለኝ።  |  |  |  |
| 31 | በኢትዮጵያ ውስጥ ፀረ-ባክቴሪያ የሚካተቱት በመድሃኒት ማዘዣ ብቻ ከሚሰጡ መድሃኒቶች ውስጥ ነው።                                    |  |  |  |
| 32 | በኢትዮጵያ ውስጥ የፋርማሲ ባለሙያዎች/ሰራተኞች ያለመድሃኒት ማዘዣ ፀረ-ባክቴሪያን እንዲያድሉ ህጉ ይፈቅድላቸዋል።                         |  |  |  |
| 33 | የመድሃኒት ቤት ሰራተኞች/ባለሙያዎች ፀረ-ባክቴሪያን ያለ መድሃኒት ማዘዣ ማደል ((መስጠት) ሊያስቀጣቸው ይችላል።                         |  |  |  |

**ክፍል 3: አመለካከትን በተመለከተ**

**ይህ የመጠይቅ ክፍል ስለ ፀረ-ባክቴሪያ/ዎች ስላለዎት አመለካከት ነው። እባክዎ ተገቢው ሰጥን ላይ ምልክት በማድረግ ይምረጡ።**

ለእያንዳንዱ ጥያቄ አንድ ሰጥን ብቻ ላይ ነው ምልክት የሚያደርጉት

| ተ.ቁ | ጥያቄ                                                                                                                                                                                               | በጣም አልስማማም | አልስማማም | ገለልተኛ | እስማማለሁ | በጣም እስማማለሁ |
|-----|---------------------------------------------------------------------------------------------------------------------------------------------------------------------------------------------------|------------|--------|-------|--------|------------|
| 1   | እንደኔ እምነት ፀረ-ባክቴሪያ/ዎች ከሚከተሉት የጤና እክሎች ለማገገም ሚና ሊኖራቸው ይችላል መንስኤዎቻቸው ምንም ቢሆን፤<br><br>7. ትኩሳት<br>8. ጉንፋን እና ሳል<br>9. አጣዳፊ የጉሮሮ ህመም<br>10. አጣዳፊ ተቅማጥ<br>11. የቁስል ኢንፌክሽን<br>12. ያልተባባሰ የሽንት ቧንቧ ኢንፌክሽን |            |        |       |        |            |
| 2   | የመድሃኒት ቤት ሰራተኞች/ባለሙያዎች ፀረ-ባክቴሪያ/ዎችን ያለመድሃኒት ማዘዣ ማደል አለባቸው ምክንያቱም ፀረ-ባክቴሪያን ያለመድሃኒት ማዘዣ ከማደል መቆጠብ የመድሃኒት ቤት ሽያጭ እና ትርፍ ላይ አሉታዊ ትፅዕኖ ስለሚኖረው።                                                        |            |        |       |        |            |
| 3   | ስለ ፀረ-ባክቴሪያ/ዎች በትምህርት ያገኘሁት ወይም ያለኝ እውቀት ፀረ-ባክቴሪያ/ዎችን ያለ መድሃኒት ማዘዣ ለማደል ያስችላኛል ወይም በቂ ነው።                                                                                                         |            |        |       |        |            |
| 4   | የመድሃኒት ቤት ሰራተኞች/ባለሙያዎች ፀረ-ባክቴሪያ/ዎችን ያለመድሃኒት ማዘዣ ማደል አለባቸው ምክንያቱም ፀረ-ባክቴሪያን ያለመድሃኒት ማዘዣ ከማደል መቆጠብ ህሙሳን በመድሃኒት ቤቱ አገልግሎት ላይ እርካታ እንዳይኖራቸው መንስኤ ይሆናል።                                                |            |        |       |        |            |
| 5   | የመድሃኒት ቤት ሰራተኞች/ባለሙያዎች ፀረ-ባክቴሪያ/ዎችን ያለመድሃኒት ማዘዣ ማደል አለባቸው ምክንያቱም ህሙሳን ፀረ-ባክቴሪያ/ዎቹ ያለመድሃኒት ማዘዣ ካልተሸጠላቸው፤ ህሙሳን በቀላሉ ከሃኪማቸው ፀረ-ባክቴሪያ የተፃፈበት የመድሃኒት ማዘዣ ማግኘት ይችላሉ።                                    |            |        |       |        |            |
| 6   | ሽያጭ እና ትርፍን ለመጨመር ከመድሃኒት ቤት ባለቤት የሚመጣ ጫና ከባድ ስለሆነ፤ የመድሃኒት ቤት ሰራተኞች/ባለሙያዎች ፀረ-ባክቴሪያ/ዎችን ያለመድሃኒት ማዘዣ ማደል አለባቸው።                                                                                     |            |        |       |        |            |
| 7   | ትክክለኛ የፀረ-ባክቴሪያ እደላን ለማሻሻል በህብረተሰቡ ውስጥ የሚገኙ መድሃኒት ቤቶች ውስጥ የሚሰሩ የመድሃኒት ቤቶች ሰራተኞች/ባለሙያዎች ስለ ፀረ-ባክቴሪያ/ዎች በቂ ትምህርት ማግኘት አለባቸው።                                                                        |            |        |       |        |            |

|    |                                                                                                                                                                                                                                                                                                                                                                                                                                                      |  |  |  |  |  |
|----|------------------------------------------------------------------------------------------------------------------------------------------------------------------------------------------------------------------------------------------------------------------------------------------------------------------------------------------------------------------------------------------------------------------------------------------------------|--|--|--|--|--|
| 8  | የመድሃኒት ቤት ሰራተኛ/ባለሙያ ፀረ-ባክቴሪያ/ዎችን ያለመድሃኒት ማዘዝ ማደል አለበት ምክንያቱም ህሙማን ፀረ-ባክቴሪያ/ዎች ያለመድሃኒት ማዘዝ ካልተሸጠላቸው፤ ፀረ-ባክቴሪያ/ዎችን በቀላሉ ከሌላ መድሃኒት ቤት ማግኘት ይቻላሉ።                                                                                                                                                                                                                                                                                                        |  |  |  |  |  |
| 9  | ህሙማን ወደ መድሃኒት ቤቱ የመጡበት ምክንያት የባክቴሪያ ኢንፌክሽን ከሆነ የመድሃኒት ቤቱ ሰራተኛ/ባለሙያዎች ፀረ-ባክቴሪያ/ዎችን ያለመድሃኒት ማዘዝ ማደል ይኖርባቸዋል።                                                                                                                                                                                                                                                                                                                                           |  |  |  |  |  |
| 10 | የመድሃኒት ቤት ሰራተኛ/ባለሙያዎች ፀረ-ባክቴሪያ/ዎችን ያለመድሃኒት ማዘዝ ማደል የለባቸውም ምክንያቱም ያለ መድሃኒት ማዘዝ ፀረ-ባክቴሪያዎችን ማደል የፀረ-ባክቴሪያዎችን መቋቋም እንዲከሰት ያደረጋል።                                                                                                                                                                                                                                                                                                                        |  |  |  |  |  |
| 11 | የመድሃኒት ቤት ሰራተኛ/ባለሙያዎች ፀረ-ባክቴሪያ/ዎችን ያለ መድሃኒት ማዘዝ ማደል ይቻላሉ ምክንያቱም እንደ እኔ አስተያየት የፀረ-ባክቴሪያ/ዎች የአጠቃቀም ሁኔታ ሁልጊዜ የፀረ-ባክቴሪያዎች መቋቋም መንስኤ ስለማይሆን።                                                                                                                                                                                                                                                                                                             |  |  |  |  |  |
| 12 | የመድሃኒት ቤት ሰራተኛ/ባለሙያዎች ህሙማን ሃኪም ለመጎብኘት ሰዐትም ሆነ ገንዘብ እንደሌላቸው ካወቁ ፀረ-ባክቴሪያ/ዎችን ያለመድሃኒት ማዘዝ ማደል ይኖርባቸዋል።                                                                                                                                                                                                                                                                                                                                                 |  |  |  |  |  |
| 13 | በኢትዮጵያ ውስጥ በጠቅላላ ህብረተሰብ ዘንድ ቀድሞዎቹ ፀረ-ባክቴሪያ/ዎችን ከመጥን በላይ ተጠቅመዉባቸዋል፤ ስለዚህ ፀረ-ባክቴሪያ/ዎችን ያለ መድሃኒት ማዘዝ ማደል ነገሮችን/ችግሮችን ሊያባብስ አይችልም።                                                                                                                                                                                                                                                                                                                       |  |  |  |  |  |
| 14 | ያለ መድሃኒት ማዘዝ የሚደረግ የፀረ-ባክቴሪያ/ዎችን እደላ የቁጥጥር ባለስልጣናት በቅርብ ሊቆጣጠሩት ይገባል።                                                                                                                                                                                                                                                                                                                                                                                 |  |  |  |  |  |
| 15 | የመድሃኒት ቤት ሰራተኛ/ባለሙያዎች ህሙማን መድሃኒት ቤቶችን ከመጎብኘታቸው በፊት ሃኪምን እንዲያማክሩ እና መድሃኒት ማዘዝ እንዲያገኙ ማበረታት አለባቸው።                                                                                                                                                                                                                                                                                                                                                     |  |  |  |  |  |
| 16 | ትክክል የሆነ የፀረ-ባክቴሪያ/ዎች አጠቃቀምን ማጎልበት የጤና ባለሙያዎች፤ ህሙማን እና ፖሊሲ ሰዎች የጋራ ድርሻ ነው።                                                                                                                                                                                                                                                                                                                                                                           |  |  |  |  |  |
| 17 | እንደእኔ እምነት እንደ አንድ የመድሃኒት ቤት ሰራተኛ/ባለሙያ፤ በኢትዮጵያ ውስጥ ትክክለኛ የፀረ-ባክቴሪያ/ዎች አጠቃቀም እንዲኖር አስተዋጾ የማድረግ መብት አለኝ።                                                                                                                                                                                                                                                                                                                                               |  |  |  |  |  |
| 18 | የመድሃኒት ቤት ሰራተኛ/ባለሙያዎች ፀረ-ባክቴሪያ/ዎችን ያለመድሃኒት ማዘዝ ማደል አለባቸው ምክንያቱም የህሙማን ፊላጎት/ጥያቄ በየጊዜው እየጨመረ ባለበት ሁኔታ ፀረ-ባክቴሪያን ያለመድሃኒት ማዘዝ ከማደል መቆጠብ ሁልጊዜ አስቸጋሪ ስለሆነ።                                                                                                                                                                                                                                                                                                 |  |  |  |  |  |
| 19 | የፀረ-ባክቴሪያ/ዎችን መቋቋም መከሰት ለመከላከል ህሙማን ራስን በራስ በፀረ-ባክቴሪያ/ዎች ማከም ማቆም አለባቸው።                                                                                                                                                                                                                                                                                                                                                                              |  |  |  |  |  |
| 20 | ፀረ-ባክቴሪያ/ዎችን ያለ መድሃኒት ማዘዝ ማደል ችግር የለውም ምክንያቱም፤ <ul style="list-style-type: none"> <li>6. እንደእኔ እምነት ፀረ-ባክቴሪያ/ዎች ምንም ችግር የማያስከትሉ መድሃኒቶች ስለሆኑ።</li> <li>7. እንደእኔ እምነት ፀረ-ባክቴሪያ/ዎች ምንም ወይንም በጣም ትንሽ የጎንኞሽ ጉዳት ስለሚያስከትሉ።</li> <li>8. እኔ የህሙማንን የፀረ-ባክቴሪያ ፍላጎት መርምሮ ወይንም ለይቶ የማወቅ ብቃቱ ስለሌለኝ።</li> <li>9. እኔ ለህሙማን ፀረ-ባክቴሪያ/ዎችን ማዘዝ ያለብኝ እንደሆነ ወይንም ወደ ሃኪም መላክ እንዳለብኝ ስለማወቅ።</li> <li>10. እኔ በትክክል ህሙማንን ስለ ትክክለኛ ፀረ-ባክቴሪያ/ዎች አጠቃቀም መምከር ስለምችል።</li> </ul> |  |  |  |  |  |

**ክፍል 4: ተግባርን በተመለከተ**

**ይህ የመጠይቅ ክፍል ስለ ፀረ-ባክቴሪያ/ዎች እድላ አተገባበርን በተመለከተ ነው። እባክዎ ተገቢው ሳጥን ላይ ምልክት በማድረግ አተገባበርዎ በምን ያህል መጠን/ድግግሞሽ እንደሆነ ያሳውቁን።**

ለእያንዳንዱ ጥያቄ አንድ ሳጥን ብቻ ላይ ነው ምልክት የሚያደርጉት

| ተ.ቁ | ጥያቄ                                                                                                                                                                            | በፍፁም (0%) | አንዳንድ ጊዜ (25%) | በከፊል (ገሚሱን ጊዜ) (50%) | አብዝሃኛውን ጊዜ (75%) | ሁል ጊዜ (100%) |
|-----|--------------------------------------------------------------------------------------------------------------------------------------------------------------------------------|-----------|----------------|----------------------|------------------|--------------|
| 1   | እኔ ፀረ-ባክቴሪያ/ዎችን ያለ መድሃኒት ማዘዝ እስጣለሁ።                                                                                                                                            |           |                |                      |                  |              |
| 2   | ከህሙማን/ደንበኞች በቀጥታ ጥያቄዎ ከመጣ ፀረ-ባክቴሪያ/ዎችን ያለ መድሃኒት ማዘዝ እስጣለሁ።                                                                                                                     |           |                |                      |                  |              |
| 3   | በባክቴሪያል ኢንፎክሽን ለተያዘ ጎልማሳ፤ የመድሃኒት ማዘዝ ሳልጠይቅ ፀረ-ባክቴሪያ እስጣለሁ።                                                                                                                     |           |                |                      |                  |              |
| 4   | ታማሚው የቤተሰብ አባል ወይም የማዕቀው ሰው ከሆነ ያለመድሃኒት ማዘዝ ፀረ-ባክቴሪያ/ዎችን እስጣለሁ።                                                                                                                |           |                |                      |                  |              |
| 5   | ህሙማን በጥቃቅን ህመሞች(ማይነር ኤልመንት) ከመጡ ፀረ-ባክቴሪያ/ዎችን ያለመድሃኒት ማዘዝ እንደ ሌሎች ያለማዘዝ እንደሚሰጡ መድሃኒቶች እስጣለሁ።                                                                                    |           |                |                      |                  |              |
| 6   | ፀረ-ባክቴሪያ/ዎችን ያለ መድሃኒት ማዘዝ በኢንፎክሽን ለተያዙ ልጆች እስጣለሁ።                                                                                                                              |           |                |                      |                  |              |
| 7   | በቫይረስ ኢንፎክሽን ለተያዙ ልጆች፤ ፀረ-ባክቴሪያ/ዎችን ያለመድሃኒት ማዘዝ እስጣለሁ።                                                                                                                         |           |                |                      |                  |              |
| 8   | በቫይረስ ኢንፎክሽን ለተያዙ ጎልማሳ፤ ፀረ-ባክቴሪያ/ዎችን ያለ መድሃኒት ማዘዝ እስጣለሁ።                                                                                                                       |           |                |                      |                  |              |
| 9   | ለሚከተሉት የጤና እክሎች በባለፈው ሳምንት ያለ መድሃኒት ማዘዝ ፀረ-ባክቴሪያ/ዎች በምን ያህል መጠን ስጥቀል?<br><br>ጉንፋን ወይም ሳል አጣዳፊ ተቅማጥ ያልተባባሰ የሽንት ቧንቧ ኢንፎክሽን የቁስል ኢንፎክሽን አጣዳፊ የጉሮሮ ማበጥ                            |           |                |                      |                  |              |
|     |                                                                                                                                                                                |           |                |                      |                  |              |
|     |                                                                                                                                                                                |           |                |                      |                  |              |
|     |                                                                                                                                                                                |           |                |                      |                  |              |
|     |                                                                                                                                                                                |           |                |                      |                  |              |
| 10  | የሚከተሉትን በሽታዎች ወይም የበሽታ ምልክቶችን የሚያሳዩ ህሙማን በአሁኑ ጊዜ ቢመጡ ፀረ-ባክቴሪያ/ዎችን ያለ መድሃኒት ማዘዝ በምን ያህል መጠን ይሰጣሉ?<br><br>ጉንፋን ወይም ሳል አጣዳፊ ተቅማጥ ያልተባባሰ የሽንት ቧንቧ ኢንፎክሽን የቁስል ኢንፎክሽን አጣዳፊ የጉሮሮ ማበጥ |           |                |                      |                  |              |
|     |                                                                                                                                                                                |           |                |                      |                  |              |
|     |                                                                                                                                                                                |           |                |                      |                  |              |
|     |                                                                                                                                                                                |           |                |                      |                  |              |
|     |                                                                                                                                                                                |           |                |                      |                  |              |

11. በአብዛሃኛው በመድሃኒት ቤትዎ ያለ መድሃኒት ማዘዣ የሚሰጡ ፀረ-ባክቴሪያ/ዎችን እባክዎ ከታች ባለው ክፍት ቦታ ይዘርዝሩልን?

12. በመድሃኒት ቤትዎ ፀረ-ባክቴሪያ/ዎችን ያለ መድሃኒት ማዘዣ በአብዛሃኛው የሚሰጡበት ምክንያት/ቶችን ወይንም የጤና እክሎችን እባክዎ ይንገሩን?

**ስለተሳተፋችሁ እናመሰግናለን!**
