# Supplementary material for: Community drug retail outlet staff’s knowledge, attitudes and practices towards non-prescription antibiotics use and antibiotic resistance in the Amhara region, Ethiopia with a focus on non-urban towns
Source: PubMed Central journal article supplement (PMC9052473; doi:10.1186/s13756-022-01102-1), 2022-04-29
Supplement: 13756_2022_1102_MOESM2_ESM.pdf [file 13756_2022_1102_MOESM2_ESM.pdf]

## **Additional file 2: Figure S1**

**Community drug retail outlet staff's knowledge, attitudes and practices towards non-prescription antibiotics use and antibiotic resistance in the Amhara region, Ethiopia with a focus on non-urban towns.**

Sewunet Admasu Belachew<sup>1, 2\*</sup>, Lisa Hall<sup>1</sup>, Linda A Selvey<sup>1</sup>

<sup>1</sup>School of Public Health, The University of Queensland, 288 Herston Rd, Herston, Qld 4006, Australia

<sup>2</sup>School of Pharmacy, Faculty of Medicine and Health Sciences, University of Gondar, Ethiopia

### **\*Corresponding author**

Sewunet Admasu Belachew

School of Public Health, The University of Queensland, 288 Herston Rd, Herston, Qld 4006, Australia

Email: [s.admasubelachew@uq.edu.au](mailto:s.admasubelachew@uq.edu.au)

### **Authors' email address**

Linda A Selvey: [l.selvey@uq.edu.au](mailto:l.selvey@uq.edu.au)

Lisa Hall: [l.hall3@uq.edu.au](mailto:l.hall3@uq.edu.au)

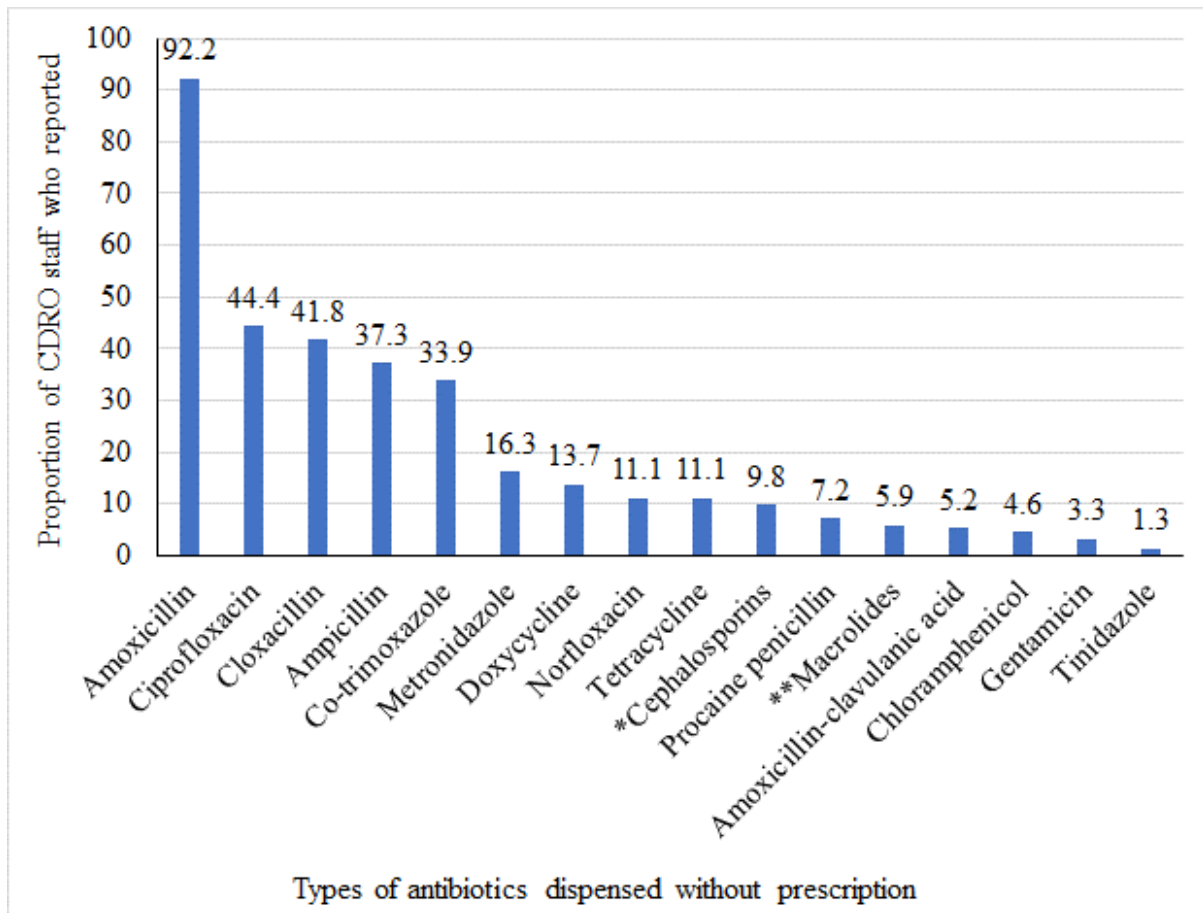

**Fig. S 1: The types of antibiotics most dispensed without prescription as reported by the 153 participants**

\***Cephalosporins:** cephalexin and/or ceftriaxone and/or cefixime

\*\***Macrolides:** azithromycin and/or erythromycin
